# Supplementary material for: Formation of a water-mediated assembly of two neutral copper(ii) Schiff base fragments with a Cu2(NCS)4moiety: exploration of non-covalent C–H⋯π(bimetallo ring) interactions
Source: Royal Society of Chemistry journal article supplement (doi:10.1039/c7ce01473b), 2018-01-01
Supplement: c7ce01473b1.pdf [file c7ce01473b1.pdf]

**Formation of a water mediated assembly of two neutral  
copper(II) Schiff base fragments with  $\text{Cu}_2(\text{NCS})_4$  moiety:  
Exploration of non-covalent C-H $\cdots\pi$ (bimetallo ring) interactions**

**Sourav Roy,<sup>a</sup> Michael G. B. Drew,<sup>b</sup> Antonio Bauzá,<sup>c</sup> Antonio Frontera,<sup>\*c</sup> Shouvik  
Chattopadhyay<sup>\*a</sup>**

*<sup>a</sup>Department of Chemistry, Inorganic Section, Jadavpur University, Kolkata - 700032,  
India.*

*Tel: +9133-2457-2941; E-mail: shouvik.chem@gmail.com*

*<sup>b</sup>School of Chemistry, The University of Reading, P.O. Box 224, Whiteknights, Reading  
RG6 6AD, United Kingdom*

*<sup>c</sup>Departamento de Química, Universitat de les Illes Balears, Crta. deValldemossa km  
7.5, 07122 Palma, Balears, Spain. E-mail: toni.frontera@uib.es*

---

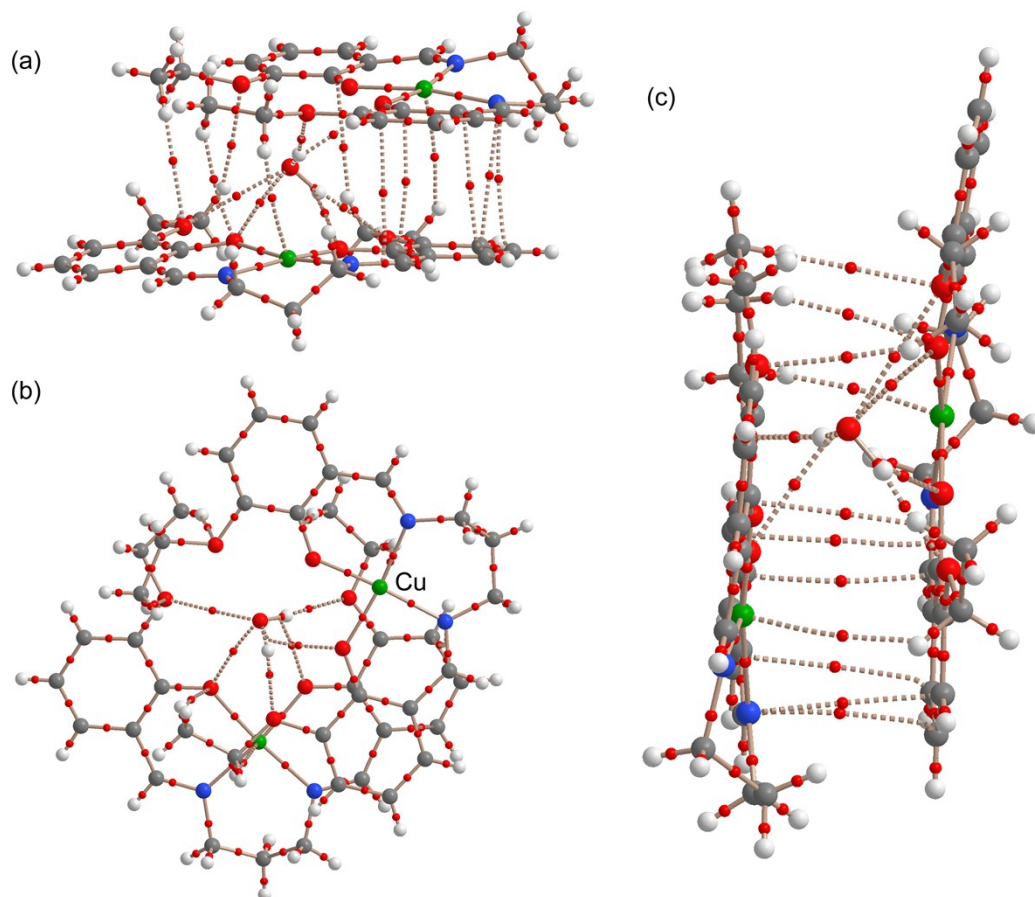

**Fig. S1:** Complete distribution of bond, CPs (red spheres) and bond paths connecting the bond CPs in a dimer of the complex using two perspective views (a,c) and an on-top view (b).
